# Supplementary material for: Task-specific effects of reward on task switching
Source: Springer Nature journal article supplement (doi:10.1007/s00426-014-0595-z), 2014-07-02
Supplement: MOESM1 [file 523046]

**Supplementary materials**

Means and standard errors for each analysis are provided in Table S.1.

Table S.1. Task switching performance in reaction times and error rates across the three phases.

***RT - Analyses across three phases:***


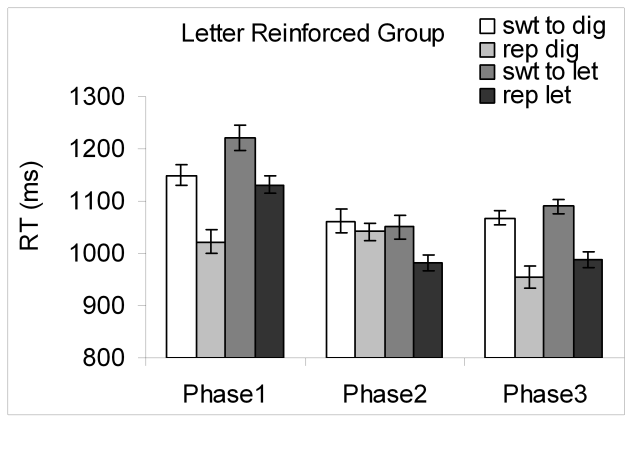

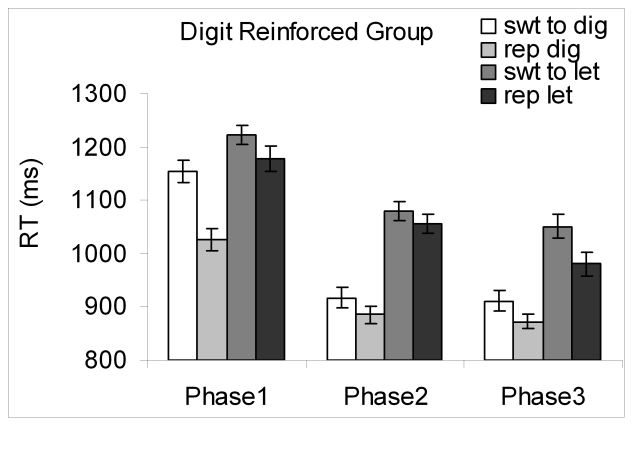
To examine whether the reinforcement effect depended specifically on which task was reinforced (i.e., group), separate 3-way ANOVAs with transition (switch, repeat), task (digit, letter) as within-subjects factors, and group (digit reinforced, letter reinforced) as a between-subject factor was conducted for each phase (see Figure S.1 and S.2 for the digit reinforced- and letter reinforced- groups, respectively). In Phase 1, there was a main effect of transition, F(1,57)=39, p<.01, as predicted, and a main effect of task, with performance for the digit task faster than for the letter task, F(1,57)=46.2, p<.01, indicating that the letter task was more difficult than the digit task. There was a significant interaction of task and transition, F(1,57)=12.1, p<.01, which points to a significantly larger switch cost (SC) for the digit task than for the letter task, t(58)=-3.5, p<.01. There was no significant main effect of group, indicating that both groups performed similarly in Phase 1, as expected. In Phase 2, the main effect of transition was again significant, F(1,57)=14.9, p<.01, as well as the main effect of task, with the digit task performed faster than the letter task, F(1,57)=20.9, p<.01. Further, there was a significant interaction of task and group, F(1,57)=50, p<.01, indicating that task performance depended on which task was reinforced (detailed analysis below). There was no interaction of transition and task, and the 3-way interaction also failed to reach significance, F(1,57)=2.4, p=.13. In Phase 3, there was a significant main effect of transition and task. Switch trials were slower than repeat trials, F(1,57)=62.4, p<.01. The digit task was performed faster than the letter task, F(1,57)=38.2, p<.01. Transition also interacted with group, F(1,57)=6.5, p=.01, indicating that reinforcement (i.e., group) differently affected SC. Task and group again interacted significantly, F(1,57)=14.8, p<.01, indicating differences in task performance between groups (detailed analysis below). A 3-way interaction did not reach significance, F(1,57)=2, p=.2.

Figure S.2. RT results across three phases for the letter reinforced group. “swt to digit”=switching to the non-reinforced digit task. “rep digit”=repeating the digit task. “swt to letter”=switching to the reinforced letter task. “rep letter”=repeating the letter task. The within-subject standard error bars are shown.

Figure S.1. RT results across three phases for the digit reinforced group. “swt to digit”=switching to the reinforced digit task. “rep digit”=repeating the digit task. “swt to letter”=switching to the non-reinforced letter task. “rep letter”=repeating the letter task. The within-subject standard error bars are shown.


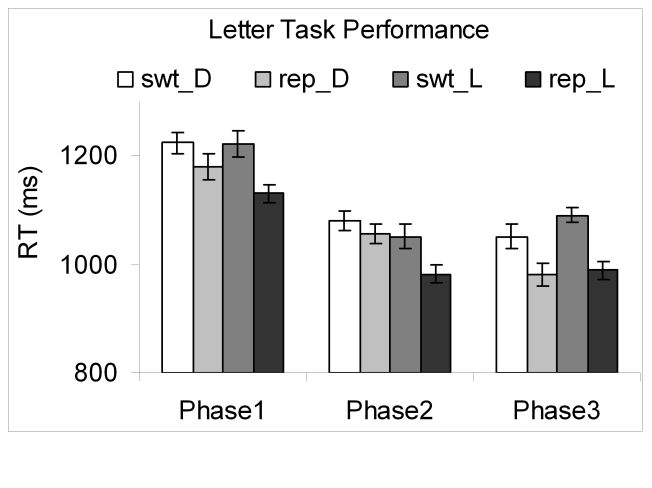

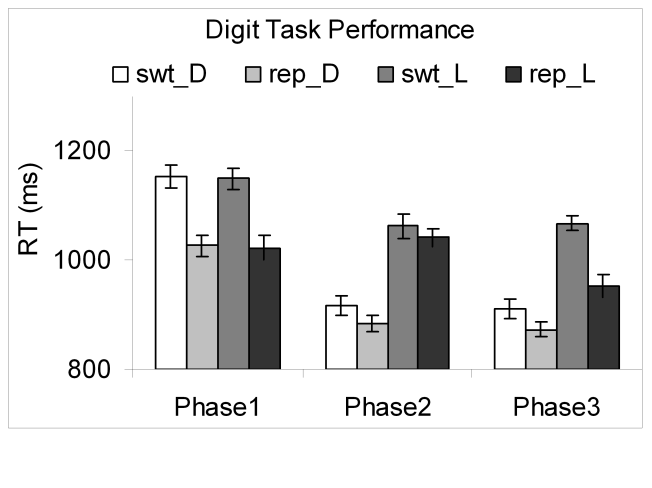
Next, separate 2-way ANOVAs were conducted for the digit and letter task performance for each phase, with transition as a within-subject factor and group as a between-subject factor. ***Digit task performance*** (Figure S.3): In Phase 1, there was a main effect of transition, F(1,57)=50.4 p<.01. There was no main effect of group or interaction of transition and group, indicating that the two groups performed the digit task similarly in Phase 1. In Phase 2, there was a marginally significant main effect of transition, F(1,57)=3.7, p=.06. There was a significant main effect of group, with the digit task performed faster by the digit-reinforced group, than the letter-reinforced group, F(1,57)=8, p=.01. There was no significant interaction of transition and group. In Phase 3, there was a significant main effect of transition, with switch trials slower than repeat trials, F(1,57)=39.3, p<.01. There was again a significant main effect of group such that the digit task was performed faster by the digit-reinforced group than by the letter-reinforced group, F(1,57)=6.6, p=.01, although reward was no longer provided. Interaction of transition and group was also significant, F(1,57)=9.5, p<.01. ***Letter task performance*** (Figure S.4): In Phase 1, there was a main effect of transition, F(1,57)=14.8, p<.01. No other effects were significant. In Phase 2, there was a main effect of transition, F(1,57)=14.5, p<.01. There was no significant main effect of group, indicating that, unlike the digit task performance, the letter task was performed similarly by the two groups regardless of which task was reinforced. However, the interaction of transition and group was marginally significant, F(1,57)=3.2, p=.08, indicating
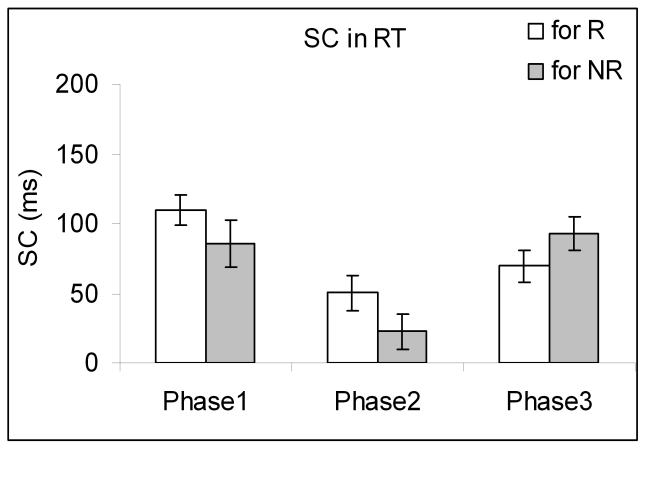
differences in SC between the two groups (see the SC analysis below).In Phase 3, there was a significant main effect of transition, with switch trials slower than repeat trials, F(1,57)=38.6, p<.01. The main effect of group or the interaction of transition and group was not significant.

Figure S.3. RT results across three phases for the digit task performance. “swt_D”=switching to the digit task for the digit reinforced group. “rep_D”=repeating the digit task for the digit reinforced group. “swt_L”=switching to the digit task for the letter reinforced group. “rep_L”=repeating the digit task for the letter reinforced group. The within-subject standard error bars are shown.

Figure S.4. RT results across three phases for the letter task performance. “swt_D”=switching to the letter task for the digit reinforced group. “rep_D”=repeating the letter task for the digit reinforced group. “swt_L”=switching to the letter task for the letter reinforced group. “rep_L”=repeating the letter task for the letter reinforced group. The within-subject standard error bars are shown.

Figure S.5. Switch cost (SC) results in RT across three phases for both groups. “for R”=SC for the reinforced task. “for NR”=SC for the non-reinforced task. The within-subject standard error bars are shown.

***Switch Cost-RT***


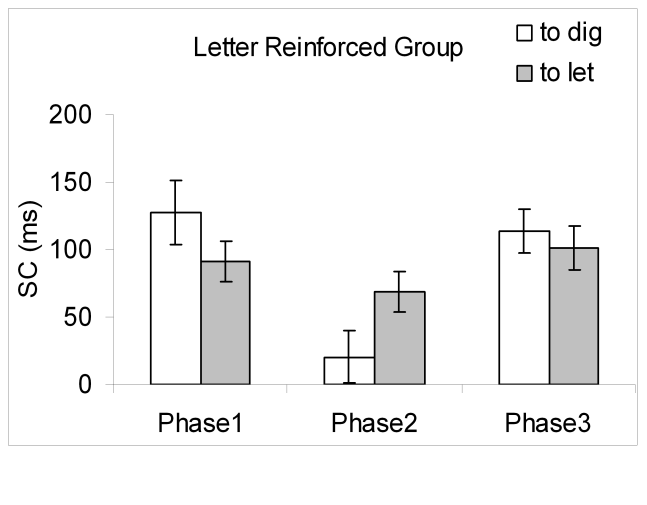
We examined whether reinforcement specifically affected SC for tasks that were reinforced. A 2-way ANOVA, with phase (phase 1 through 3) and reinforcement (reinforced task,
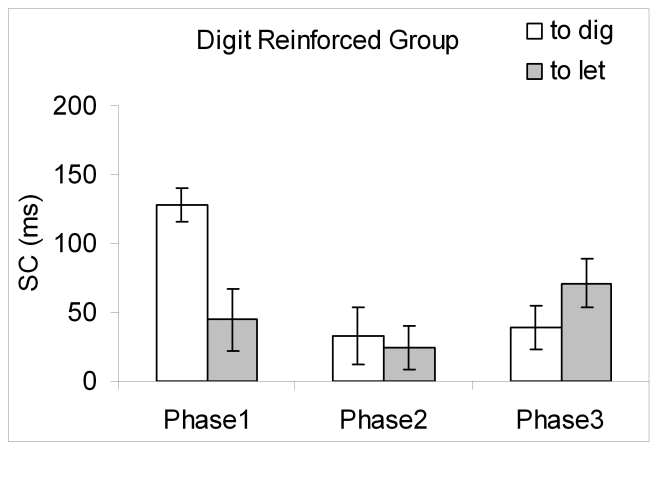
not reinforced task) as within-subject factors (see Figure S.5) showed a significant main effect of phase, F(2,116)=11.1, p<.01, which was a quadratic trend, F(1,58)=24.6, p<.01. There was no significant main effect of reinforcement. Phase almost interacted with reinforcement, F(2,116)=3, p=.06, indicating that reinforcement affected performance differently in the three phases.

Figure S.7. Switch cost (SC) results in RT across three phases for the letter reinforced group. “to dig”=SC for the digit task. “to let”=SC for the letter task. The within-subject standard error bars are shown.

Figure S.6. Switch cost (SC) results in RT across three phases for the digit reinforced group. “to dig”=SC for the digit task. “to let”=SC for the letter task. The within-subject standard error bars are shown.

We then conducted separate 2-way ANOVAs on SC with task (digit, letter) as a within-subject factor and group (digit reinforced, letter reinforced) as a between-subject factor for each phase (Figure S.6 & S.7 for the digit and letter reinforced group, respectively). In phase 1, a main effect of task was significant, with SC for the digit task larger than for the letter task, F(1,57)=12.1, p<.01. There was no significant interaction of task and group. In Phase 2, no effects reached statistical significance (interaction: F(1,57)=2.4, p=.12). In Phase 3, no effects were significant.

***Error Rates - Analyses across three phases:***


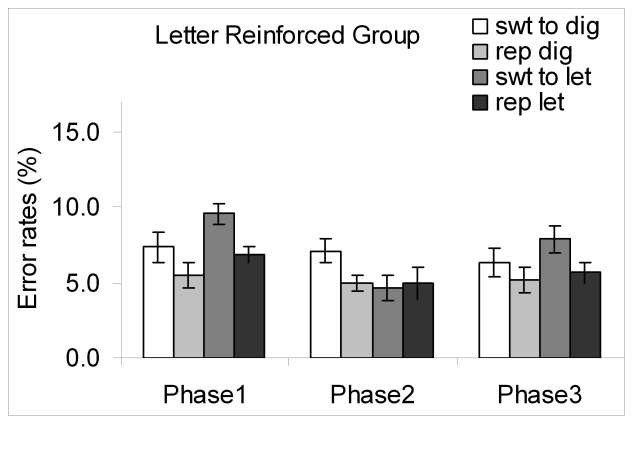

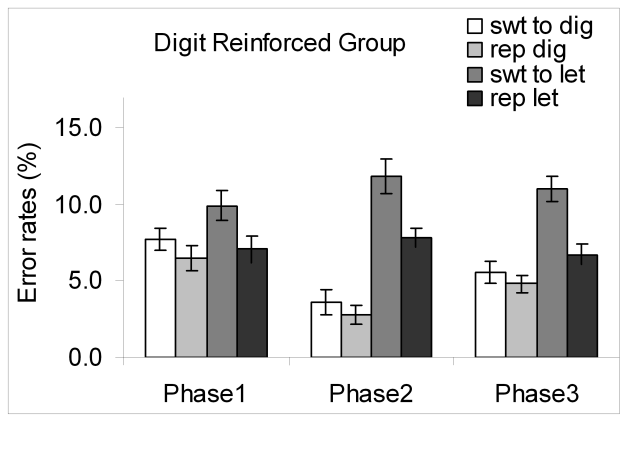
We examined whether the reinforcement effect on error rates depended on which task was reinforced (i.e., group). Separate 3-way ANOVAs with transition (switch, repeat), task (digit, letter) as within-subjects factors, and group (digit reinforced, letter reinforced) as a between-subject factor was conducted for each of the three phases (see Figure S.8 for the digit-reinforced group, Figure S.9 for the letter-reinforced group). In Phase 1, there was a main effect of transition, F(1,57)=17.6, p<.01. There was also a significant main effect of task, such that the letter task showed more errors than the digit task, F(1,57)=8.3, p<.01, indicating that the letter task was harder than the digit task, consistent with the RT analysis. No other effects were significant. In Phase 2, a main effect of transition was significant, F(1,57)=11.1, p<.01. There was a significant main effect of task, with more errors for the letter task than for the digit task, F(1,57)=16.6, p<.01. An interaction of task and group was significant, F(1,57)=35.6, p<.01, indicating that task performance depended on which task was reinforced (detailed analysis is shown below). A 3-way interaction was significant as well, F(1,57)=8.6, p<.01, indicating that reinforcement affected task performance, as well as SC. In Phase 3, a main effect of transition was significant, with switch trials showing more errors than repeat trials, F(1,57)=19.5, p<.01. A main effect of task was significant, with the letter task showing higher errors than the digit task, F(1,57)=20.1, p<.01. The interaction of group and task was again significant, F(1,57)=6.3, p=.02, indicating that the effect of reinforcement on task performance persisted from phase 2 to phase 3. An interaction of task and transition was also significant, F(1,57)=4.9, p=.03. The 3-way interaction was not significant.

Figure S.9. Error rates across three phases for the letter reinforced group. “swt to digit”=switching to the non-reinforced digit task. “rep digit”=repeating the digit task. “swt to letter”=switching to the reinforced letter task. “rep letter”=repeating the letter task. The within-subject standard error bars are shown.

Figure S.8. Error rates across three phases for the digit reinforced group. “swt to digit”=switching to the reinforced digit task. “rep digit”=repeating the digit task. “swt to letter”=switching to the non-reinforced letter task. “rep letter”=repeating the letter task. The within-subject standard error bars are shown.


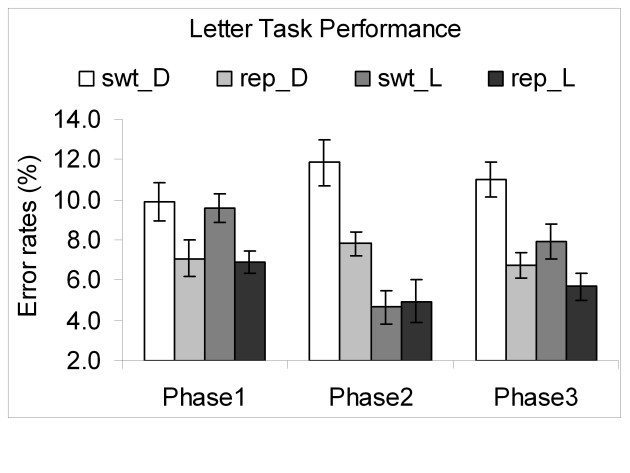

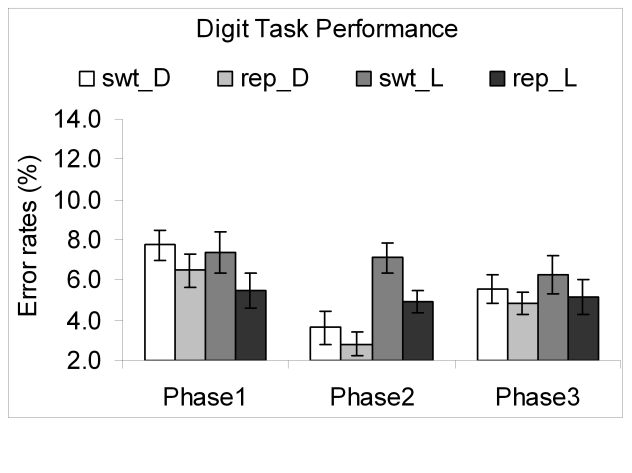
 Finally, separate 2-way ANOVAs were conducted for the digit and letter tasks for each three phases, with transition as a within-subject factor and group as a between-subject factor. ***Digit task performance*** (see Figure S.10): In Phase 1, there was a near significant main effect of transition, F(1,57)=3.8, p=.06. There was no significant main effect of group, or the interaction of transition and group. In Phase 2, a main effect of transition was significant, F(1,57)=6.7, p=.01. There was a significant main effect of group, with the digit-reinforced group revealing fewer errors on the digit task than the letter-reinforced group, F(1,57)=9.2, p<.01, suggesting reinforcement enhanced accuracy for the reinforced task. There was no significant interaction of transition and group. In Phase 3, no significant effects were observed in any of the factors tested. ***Letter task performance*** (see Figure S.11): In Phase 1, there was a significant main effect of transition, F(1,57)=15, p<.01. No other effects were significant. In Phase 2, a main effect of transition was again significant, F(1,57)=5.4, p=.02. A main effect of group was significant, with the letter-reinforced group showing fewer errors on the letter task compared to the digit-reinforced group, F(1,57)=10.4, p<.01. The interaction between transition and group was also significant, F(1,57)=7.2, p=.01. In Phase 3, a main effect of transition was significant, with switch trials showing higher errors than repeat trials, F(1,57)=21.7, p<.01. No other effects were significant.

Figure S.10. Error rates across three phases for the digit task performance. “swt_D”=switching to the digit task for the digit reinforced group. “rep_D”=repeating the digit task for the digit reinforced group. “swt_L” =switching to the digit task for the letter reinforced group. “rep_L”=repeating the digit task for the letter reinforced group. The within-subject standard error bars are shown.

Figure S.11. Error rates across three phases for the letter task performance. “swt_D”=switching to the letter task for the digit reinforced group. “rep_D” =repeating the letter task for the digit reinforced group. “swt_L”=switching to the letter task for the letter reinforced group. “rep_L” =repeating the letter task for the letter reinforced group. The within-subject standard error bars are shown.

***
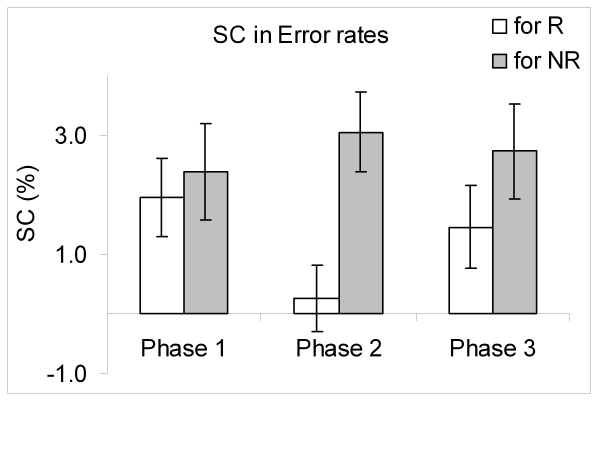
Switch Cost-Error rates***

We examined whether reinforcement affected SC for tasks that were reinforced. A 2-way ANOVA, with phase (phase 1 through 3) and reinforcement (reinforced task, not reinforced task) as within-subject factors (see Figure S.12) only showed a significant main effect of reinforcement, F(1,58)=6.5, p=.01. No other effects were significant.

Figure S.12. Switch cost (SC) results in error rates across three phases for both groups. “for R”=SC for the reinforced task. “for NR”=SC for the non-reinforced task. The within-subject standard error bars are shown.

We then conducted separate 2-way ANOVAs on SC with task (digit, letter) as a within-subject factor and group (digit reinforced, letter reinforced) as a between-subject factor for each phase (Figure S.13 & S.14 for the digit and letter reinforced group, respectively). In phase 1, no significant effects were observed. In Phase 2, there was a significant interaction of task and group, F(1,57)=8.6, p=.01, suggesting that the reduction in SC depended on which task was reinforced. Other effects were not significant. In Phase 3, there was a significant main effect of task, with SC larger for the letter task than the digit task, F(1,57)=4.9, p=.03.


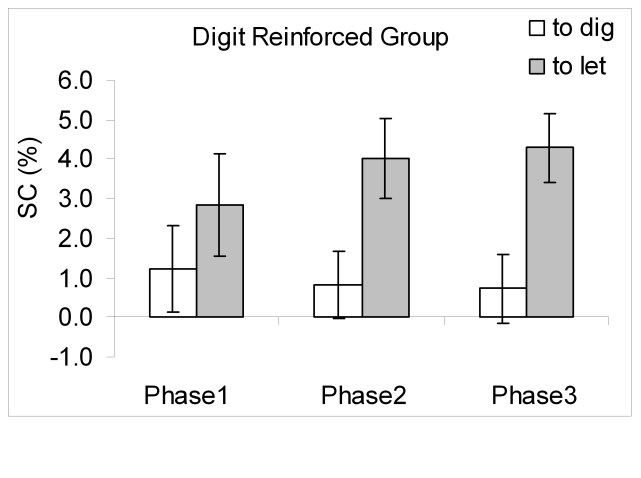

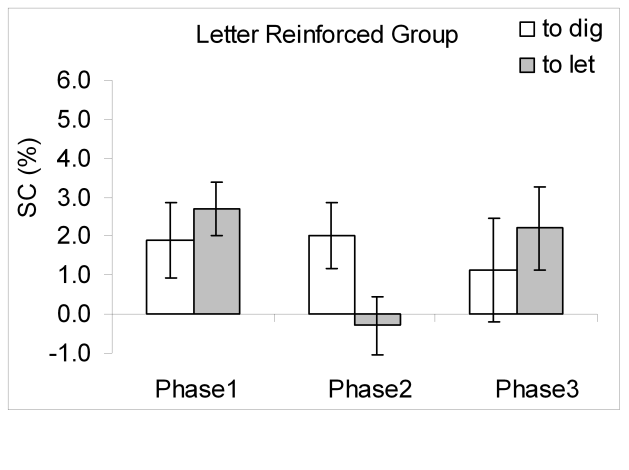


Figure S.14. Switch cost (SC) results in error rates across three phases for the letter reinforced group. “to dig”=SC for the digit task. “to let”=SC for the letter task. The within-subject standard error bars are shown.

Figure S.13. Switch cost (SC) results in error rates across three phases for the digit reinforced group. “to dig”=SC for the digit task. “to let”=SC for the letter task. The within-subject standard error bars are shown.
